# Supplementary material for: Isotopic Niche Analysis of Long-Finned Pilot Whales (Globicephala melas edwardii) in Aotearoa New Zealand Waters
Source: MDPI journal article supplement (doi:10.3390/biology11101414), 2022-09-28
Supplement: s1 [file s1]

**Table S3.** Range of carbon, nitrogen, and sulphur ( $\delta^{13}\text{C}$ ,  $\delta^{15}\text{N}$  and  $\delta^{34}\text{S}$ ), including lipid-corrected and Suess-corrected  $\delta^{13}\text{C}$  values and C:N mass ratios of long-finned pilot whales (*Globicephala melas edwardii*). Where duplicate samples were performed, the mean is given. Lab 1 = Environmental and Ecological Stable Isotope Analytical Facility, National Institute of Water and Atmosphere (Taihoro Nukurangi), Lab 2 = IsoTrace Limited.

|                           | <i>n</i> | Normalised C     | Lipid corrected C | Number lipid corrected | Suess corrected C | Normalised N   | C:N ratio    | S              |
|---------------------------|----------|------------------|-------------------|------------------------|-------------------|----------------|--------------|----------------|
| <b>Full dataset Lab 1</b> | 125      | -20.47 to -15.72 | -18.80 to -15.66  | 71                     | -18.80 to -15.53  | 11.52 to 16.28 | 3.06 to 4.48 | -              |
| <b>Subset Lab 1</b>       | 36       | -20.47 to -16.28 | -18.77 to -15.96  | 18                     | -18.57 to -15.82  | 11.52 to 16.28 | 3.08 to 4.48 | -              |
| <b>Subset Lab 2</b>       | 36       | -20.62 to -17.19 | -                 | -                      | -                 | 11.73 to 15.48 | 3.05 to 4.48 | 18.61 to 22.91 |
