# Supplementary material for: Isotopic Niche Analysis of Long-Finned Pilot Whales (Globicephala melas edwardii) in Aotearoa New Zealand Waters
Source: MDPI journal article supplement (doi:10.3390/biology11101414), 2022-09-28
Supplement: s1 [file s1]

**Table S4.** Isotopic niche total area (TA), standard ellipse area (SEA) and standard ellipse area corrected (SEAc) of carbon and nitrogen ( $\delta^{13}\text{C}$  and  $\delta^{15}\text{N}$ ) values for different reproductive status of long-finned pilot whales (*Globicephala melas edwardii*). Data are presented by location of stranding of *G. m. edwardii*.

| Farewell Spit |          |        |          |           |         | Stewart Island |        |          |         |
|---------------|----------|--------|----------|-----------|---------|----------------|--------|----------|---------|
|               | Male     |        | Female   |           | Resting | Male           |        | Female   | Resting |
|               | Immature | Mature | Pregnant | Lactating |         | Immature       | Mature | Pregnant |         |
| TA            | 2.98     | 2.23   | 3.14     | 0.74      | 1.49    | 1.98           | 0.30   | 0.38     | 0.33    |
| SEA           | 0.79     | 1.21   | 1.75     | 0.64      | 1.34    | 0.61           | 0.23   | 0.23     | 0.38    |
| SEAc          | 0.82     | 1.33   | 1.96     | 0.77      | 1.67    | 0.65           | 0.27   | 0.27     | 0.57    |
