# Supplementary material for: Isotopic Niche Analysis of Long-Finned Pilot Whales (Globicephala melas edwardii) in Aotearoa New Zealand Waters
Source: MDPI journal article supplement (doi:10.3390/biology11101414), 2022-09-28
Supplement: s1 [file s1]

**Table S2.** Bulk carbon and nitrogen and lipid-extracted carbon stable isotope values of the subset of 10 long-finned pilot whales (*Globicephala melas edwardii*) chosen for lipid extraction. “Difference” is the difference between lipid extracted and bulk non-lipid extracted  $\delta^{13}\text{C}$  values.

| ID      | Sex    | $\delta^{15}\text{N}$ (‰) | $\delta^{13}\text{C}$ (‰) | Lipid extracted $\delta^{13}\text{C}$ (‰) | Difference (‰) |
|---------|--------|---------------------------|---------------------------|-------------------------------------------|----------------|
| Gm442   | Female | 11.87                     | -18.83                    | -17.87                                    | 0.95           |
| Gm451   | Male   | 12.16                     | -18.55                    | -17.61                                    | 0.94           |
| Gm475   | Male   | 12.65                     | -20.00                    | -17.99                                    | 2.01           |
| Gm476   | Male   | 12.99                     | -20.27                    | -17.88                                    | 2.39           |
| Gm525   | Male   | 13.27                     | -18.04                    | -17.95                                    | 0.09           |
| Gm579   | Female | 12.42                     | -19.82                    | -17.91                                    | 1.91           |
| Gm609   | Male   | 13.13                     | -19.78                    | -18.37                                    | 1.41           |
| Gm613   | Male   | 13.62                     | -20.41                    | -17.98                                    | 2.43           |
| Gm627   | Female | 12.92                     | -19.57                    | -17.94                                    | 1.63           |
| Gm642   | Female | 16.28                     | -18.66                    | -18.62                                    | 0.04           |
| Average |        | 13.13                     | -19.39                    | -18.01                                    | 1.38           |
