# Supplementary material for: Isotopic Niche Analysis of Long-Finned Pilot Whales (Globicephala melas edwardii) in Aotearoa New Zealand Waters
Source: MDPI journal article supplement (doi:10.3390/biology11101414), 2022-09-28
Supplement: s1 [file s1]

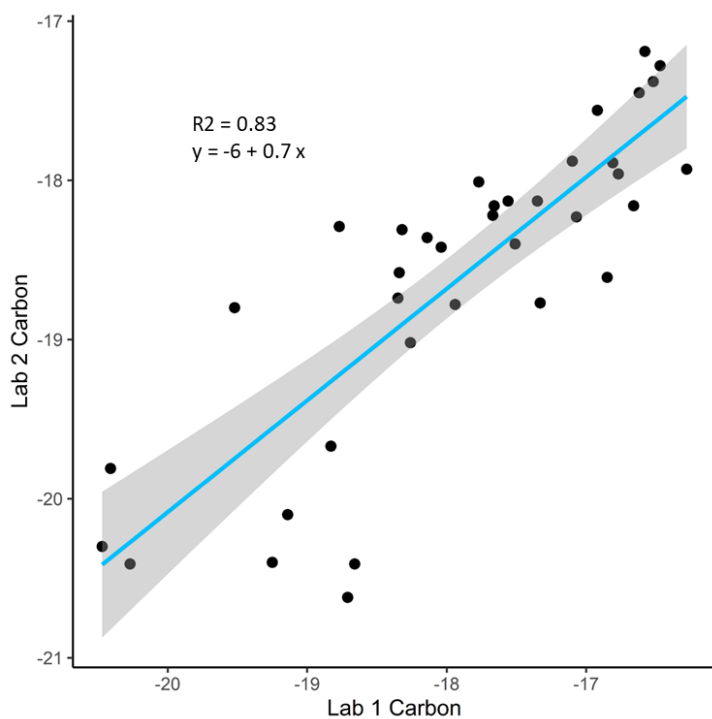

**Figure S1.** Comparison of normalised  $\delta^{13}\text{C}$  values of long-finned pilot whale (*Globicephala melas edwardii*) Lab 1 (Environmental and Ecological Stable Isotope Analytical Facility, National Institute of Water and Atmosphere; Taihoro Nukurangi), Lab 2 (IsoTrace Limited).

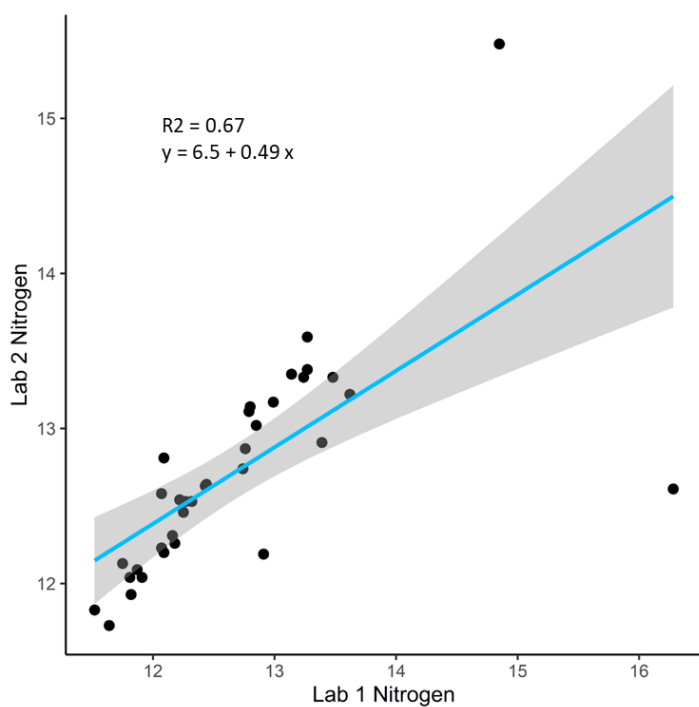

**Figure S2.** Comparison of normalised  $\delta^{15}\text{N}$  values of long-finned pilot whale (*Globicephala melas edwardii*) from Lab 1 ((Environmental and Ecological Stable Isotope Analytical Facility, National Institute of Water and Atmosphere; Taihoro Nukurangi), Lab 2 (IsoTrace Limited).
