# Supplementary material for: Isotopic Niche Analysis of Long-Finned Pilot Whales (Globicephala melas edwardii) in Aotearoa New Zealand Waters
Source: Biology (Basel). 2022 Sep 28;11(10):1414. doi: 10.3390/biology11101414 (PMC9598128; doi:10.3390/biology11101414)
Supplement: Supplementary file 1 [file biology-11-01414-s001.zip]

Archive with 5 entries (5 files):
- Figure S1 and S2. Lab comparisons of C and N values.pdf
- Table S1. Summary of samples.pdf
- Table S2. Lipid extracted values.pdf
- Table S3. Isotope values.pdf
- Table S4. TA, SEA and SEAc values.pdf
